# Supplementary material for: Ritual revealed: psychotropic substances in a Ptolemaic Egyptian vase
Source: Research Square preprint supplement (doi:10.21203/rs.3.rs-3000218/v1), 2023-05-31
Supplement: Supplementary file 1 [file 74626f445657abc3b2a5287d.docx]

**Ritual revealed: psychotropic, nutraceutical, and biological substances in a Ptolemaic Egyptian vase.**

**SUPPLEMENTARY INFORMATION**

**aDNA Metabarcoding Consensus Sequences**

Nitrariaceae:

ATCCTGTTTTACGAGAACAAACAAAGGTTCATAAAGCGAGAAAAAGT

Cleomaceae:

ATCCTGGTTTACGCGAACAAACAAGAGTTTAGAAAGCGAGAAAAAAGGG

Nymphaeaceae:

ATCCTGTTTACAGAAAACAAGGGTTCCTTTCCTAGAAAGCGAGAATCAAAAAAGAG

**Figure S1.** 3D model of the Bes-vase from the Tampa Museum of Art produced by the authors via structured light 3D scanning with an Artec Spider 3D scanner.

**
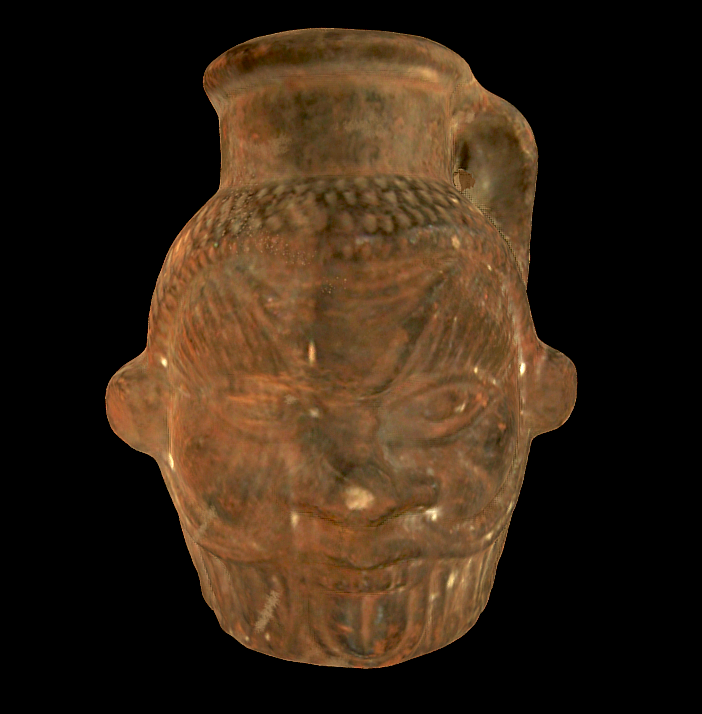
**

**Table S1.** Non-human proteins identified with coverage and unique peptides. The threshold of the unique peptides for the protein assignment was set at 3

| **Proteins** | **UniProt ID** | **Taxa** | **Score** | **Coverage (%)** | **Peptides** | **Unique peptides** |
| --- | --- | --- | --- | --- | --- | --- |
| Myosin heavy chain, muscle | P05661 | *Drosophila melanogaster* | 83,663 | 7,8 | 12 | **12** |
| Arginine kinase | O61367 | *Apis mellifera* | 42,429 | 18,3 | 5 | **4** |
| Heat shock protein SSC1, mitochondrial | P0CS90 | *Saccharomyces cerevisiae* (strain ATCC 204508 / S288c) | 40,478 | 8,4 | 5 | **4** |
| Alpha-amylase/trypsin inhibitor | P17314 | *Triticum aestivum* | 115,1 | 38,7 | 4 | **4** |
| Alpha-actinin, sarcomeric | P18091 | *Drosophila melanogaster* | 36,046 | 6 | 4 | **4** |
| V-type proton ATPase subunit B | P31409 | *Drosophila melanogaster* | 24,728 | 10,8 | 4 | **4** |
| 11S globulin seed storage protein | Q9XHP0 | *Sesamum indicum* | 26,03 | 11,8 | 4 | **4** |
| 14-3-3 protein beta/alpha-A;14-3-3 protein eta;14-3-3-like protein 2;14-3-3-like protein 1;14-3-3 protein zeta | P29310 | *Drosophila melanogaster* | 28,56 | 19,8 | 4 | **3** |
| Calmodulin | P62152 | *Drosophila melanogaster* | 18,205 | 29,5 | 3 | **3** |
| Tropomyosin-2 | P09491 | *Drosophila melanogaster* | 18,995 | 11,3 | 3 | **3** |
| ADP-ribosylation factor 1 | P36579 | *Schizosaccharomyces pombe* (strain 972 / ATCC 24843) | 20,419 | 21,7 | 3 | **3** |
| Tropomyosin-1, isoforms 33/34 | P49455 | *Drosophila melanogaster* | 35,855 | 15,1 | 4 | **3** |
| Aconitate hydratase, mitochondrial | P19414 | *Saccharomyces cerevisiae* (strain ATCC 204508 / S288c) | 20,064 | 5,2 | 3 | **3** |

**Table S2.** Human proteins identified with coverage and unique peptides. The threshold of the unique peptides for the protein assignment was set at 3

| **Proteins** | **UniProt ID** | **Taxa** | **Score** | **Coverage (%)** | **Peptides** | **Unique peptides** |
| --- | --- | --- | --- | --- | --- | --- |
| Mucin-5B | Q9HC84 | *Homo sapiens* | 150,87 | 7 | 18 | 18 |
| Lactotransferrin | P02788 | *Homo sapiens* | 123,89 | 20 | 19 | **9** |
| Polymeric immunoglobulin receptor | P01833 | *Homo sapiens* | 60,595 | 14 | 9 | **8** |
| Annexin A1 | P04083 | *Homo sapiens* | 65,733 | 31,2 | 8 | **8** |
| Arginase-1 | P05089 | *Homo sapiens* | 77,198 | 35,4 | 10 | **8** |
| Annexin A2 | P07355 | *Homo sapiens* | 146,81 | 24,5 | 15 | **8** |
| Prolactin-inducible protein | P12273 | *Homo sapiens* | 67,253 | 58,9 | 9 | **7** |
| Serpin B12 | Q96P63 | *Homo sapiens* | 117,89 | 24 | 11 | **7** |
| IgGFc-binding protein | Q9Y6R7 | *Homo sapiens* | 46,66 | 3,4 | 7 | **7** |
| Serpin B3 | P29508 | *Homo sapiens* | 294,11 | 26,4 | 14 | **6** |
| Ig kappa chain C region | P01834 | *Homo sapiens* | 80,7 | 80,4 | 6 | **6** |
| Alpha-amylase 2B | P0DUB6 | *Homo sapiens* | 62,037 | 19 | 6 | **6** |
| Ig alpha-1 chain C region | P01876 | *Homo sapiens* | 54,753 | 23,5 | 6 | **5** |
| Alpha-2-macroglobulin-like protein 1 | A8K2U0 | *Homo sapiens* | 45,368 | 4,2 | 7 | **5** |
| BPI fold-containing family B member 1 | Q8TDL5 | *Homo sapiens* | 30,776 | 15,5 | 5 | **5** |
| Serum albumin | P02768 | *Homo sapiens* | 135,58 | 19,4 | 26 | **4** |
| Cathepsin D | P07339 | *Homo sapiens* | 56,442 | 14,3 | 8 | **4** |
| Zinc-alpha-2-glycoprotein | P25311 | *Homo sapiens* | 53,363 | 18,5 | 7 | **4** |
| Calmodulin-like protein 3 | P27482 | *Homo sapiens* | 38,298 | 35,6 | 4 | **4** |
| Lysozyme C | P61626 | *Homo sapiens* | 67,759 | 40,5 | 5 | **4** |
| Desmocollin-3 | Q14574 | *Homo sapiens* | 42,15 | 6,8 | 6 | **4** |
| Suprabasin | Q6UWP8 | *Homo sapiens* | 24,943 | 20,7 | 4 | **4** |
| Zymogen granule protein 16 homolog B | Q96DA0 | *Homo sapiens* | 132,33 | 36,5 | 4 | **4** |
| Protein S100-A14 | Q9HCY8 | *Homo sapiens* | 35,287 | 54,8 | 4 | **4** |
| Hemoglobin subunit beta | P68871 | *Homo sapiens* | 72,29 | 53,7 | 9 | **3** |
| Cystatin-SN | P01037 | *Homo sapiens* | 46,359 | 56,7 | 5 | **3** |
| Gamma-glutamylcyclotransferase | O75223 | *Homo sapiens* | 36,63 | 28,2 | 5 | **3** |
| Immunoglobulin J chain | P01591 | *Homo sapiens* | 18,781 | 22,6 | 3 | **3** |
| Myeloperoxidase; | P05164 | *Homo sapiens* | 17,718 | 4,6 | 3 | **3** |
| Alpha-enolase | P06733 | *Homo sapiens* | 37,065 | 11,3 | 5 | **3** |
| Protein S100-A7 | P31151 | *Homo sapiens* | 30,075 | 22,8 | 5 | **3** |
| Protein POF1B | Q8WVV4 | *Homo sapiens* | 28,17 | 6,1 | 4 | **3** |

**Table S3.** Identification of compounds undertaken bythe untarget/target HPLC-Exploris-Orbitrap®-MS procedure using the measured m/z values of parent feature in the resolved MS/MS mass spectra and the corresponding retention times (RT) accompanied by chromatographical peak area values.

| Name | m/z | RT [min] | Area |
| --- | --- | --- | --- |
| **Alkaloids** |  |  |  |
| Harmaline | 215,1178 | 4,244 | 4,7E+09 |
| Harmine | 213,1022 | 4,272 | 3,7E+09 |
| Tetrahydro-harmine | 217,13356 | 3,943 | 1,2E+07 |
| Harmol (demethylated harmaline) | 199,0866 | 3,321 | 8,9E+06 |
| Vasicine | 189,10223 | 2,673 | 2,8E+08 |
| Ruine (7-Methoxy-1-methyl-9H-beta-carbolin-8-yl beta-D-glucopyranoside) | 391,15 | 3,082 | 1,8E+07 |
| Probable degradation of indole alkaloid (1-(6-methoxy-1H-indol-2-yl)ethan-1-imine) | 188,10696 | 3,943 | 7,5E+06 |
| Cytisine | 189,1023 | 4.85 | 1,7E+05 |
| Probable degradation of isoquinoline alkaloid (1,5-isoquinolinediol or isomer) | 162,055 | 1,059 | 3,1E+06 |
| Nicotine | 163,12299 | 1,287 | 7,3E+06 |
| Sinapine | 310,16473 | 3,46 | 2,3E+06 |
| Nupharidine | 250,18024 | 4,841 | 2,1E+06 |
| Neferine | 625,32721 | 14,54 | 1,7E+05  (traces) |
| **Carbohydrates** |  |  |  |
| Cellobiose | 377,08557 | 0,994 | 1,3E+08 |
| Gluconic acid or isomer | 195,05103 | 0,998 | 2,2E+07 |
| Hexitol | 181,07181 | 0,96 | 9,7E+06 |
| Trisaccharide (tree hexose units) | 503,16 | 0,998 | 3,3E+06 |
| Xylitol or isomer | 151,06126 | 1,008 | 2,6E+06 |
| Chitobiose | 407,24036 | 9,142 | 8,5E+05 |
| **Tannines** |  |  |  |
| Gallic acid | 169,01431 | 1,712 | 1,6E+07 |
| 1,6-Bis-O-(3,4,5-trihydroxybenzoyl)hexopyranose | 483,07806 | 3,059 | 2,4E+06 |
| 1,2,3,6-Tetra-O-galloyl-β-D-glucose | 787,09961 | 3,624 | 7,7E+05 |
| **Fatty acid and derivates** |  |  |  |
| 9,12,13-Trihydroxy-15-octadecenoic acid (9,12,13-TODEA) | 329,23335 | 6,437 | 1,2E+08 |
| Pinolenic acid | 279,23193 | 11,437 | 1,5E+07 |
| Suberic acid | 173,08197 | 4,175 | 2,8E+07 |
| 12,13-Dihydroxy-9-octadecenoic acid (12,13-DIHOME) | 313,23846 | 8,689 | 9,9E+06 |
| 9-Hydroxy-octadecadienoic acid (9-HODE) | 295,22668 | 10,66 | 9,0E+06 |
| O-Arachidonoyl ethanolamine | 348,28955 | 9,118 | 1,0E+06 |
| 12-oxo Phytodienoic Acid | 293,2111 | 9,989 | 4,3E+06 |
| **Heterocyclic compounds** |  |  |  |
| Uric acid | 167,02112 | 1,055 | 8,8E+07 |
| 6-methoxyquinoline | 160,07571 | 1,718 | 5,2E+06 |
| Xanthine | 151,02621 | 1,269 | 3,0E+06 |
| Caffeine | 195,0877 | 3,274 | 1,6E+06 |
| Fraxetin | 207,0299 | 3,805 | 1,4E+06 |
| N1-[4-(1,3-Oxazol-5-yl)phenyl]cyclopropane-1-carboxamide | 229,09724 | 3.58 | 2,1E+07 |
| **Amino acids and derivates** |  |  |  |
| N-Benzoyl-L-phenyalaninol | 256,13321 | 6,093 | 4,8E+07 |
| Arginine | 175,11899 | 0,937 | 1,3E+07 |
| Tryptophan | 188,0706 | 2,99 | 9,5E+06 |
| Phenylalanine | 166,08628 | 2,153 | 7,8E+06 |
| Carnitine | 162,11249 | 0,991 | 7,5E+06 |
| N-Acetyl-glutamic acid | 188,05644 | 1,308 | 7,0E+06 |
| Tyrosine | 182,08119 | 1,309 | 4,4E+06 |
| Histidine | 156,07681 | 0,951 | 2,4E+06 |
| **Organic acids and derivates** |  |  |  |
| Citric acid | 191,01974 | 1,271 | 1,6E+07 |
| P-coumaric acid | 165,05467 | 1,307 | 3,3E+06 |
| Gentisic acid (2,5-dihydroxybenzoic acid) | 153,01938 | 2,833 | 1,7E+06 |
| 3-Anisic acid | 151,0401 | 5,044 | 1,5E+06 |
| 4-Hydroxyphenylacetic acid | 151,0401 | 6,717 | 1,0E+06 |
| Ferulic acid | 193.0506 | 4.62 | 1,2E+06 |
| Isoferulic acid | 193,0506 | 5,479 | 2,1E+06 |
| **Flavonoids** |  |  |  |
| Quercetin 3-O-acetyl-rhamnoside | 489,10388 | 5,081 | 2,9E+07 |
| Quercitrin | 447,09311 | 4,477 | 2,4E+07 |
| Myricitrin | 463,08817 | 4,094 | 2,1E+07 |
| Myricetin 3-O-galactopyranoside | 479,08301 | 3,753 | 3,4E+06 |
| 7-Hydroxy-2-(4-hydroxyphenyl)-4-oxo-3,4-dihydro-2H-chromen-5-yl β-D-glucopyranoside (Salipurposide) o isomer Isosalipurposide | 433,11395 | 4,99 | 1,1E+07 |
| Isosalipurposide o isomer (salipurposide) | 433,11393 | 4,10 | 0.87E+07 |
| Kaempferol 3-(2''-acetylrhamnoside) | 473,10896 | 5,493 | 8,3E+06 |
| Naringenin | 273,07575 | 4,97 | 4,4E+06 |
| Afzelin (kaempferol 3-rhamnoside) | 431,09833 | 4,819 | 6,9E+06 |
| **Triterpene** |  |  |  |
| 18-β-Glycyrrhetinic acid | 469,3323 | 9,785 | 1,2E+06 |
| **Various fungal metabolites** |  |  |  |
| Neovasipyridone E | 308,22205 | 5,696 | 6,4E+06 |
| Aspernigrin A | 229,09724 | 4,69 | 2,1E+07 |
| Libertellenone G | 315,19537 | 9,835 | 1,2E+06 |
| 2-furoylglycine | 168,0302 | 5,243 | 2,8E+06 |
| **Unknown** |  |  |  |
| Unknown I | 252,10814 | 4,844 | 6,1E+06 |
| Unknown II | 403,17682 | 11,275 | 1,9E+06 |
| Unknown III | 201,1023 | 2,876 | 1,2E+07 |

**TABLE S4.** Extracted ion chromatogram from full MS and relative fragmentation pattern obtained in dd-MS2 acquisition mode for all compounds listed in Table 3.

| Harmaline |
| --- |
|  |
| Harmine |
|  |

| Tetrahydro-harmine |
| --- |
|  |

| Harmol |
| --- |
|  |

| Vasicine |
| --- |
|  |

| Ruine (7-Methoxy-1-methyl-9H-beta-carbolin-8-yl beta-D-glucopyranoside) |
| --- |
|  |

| Probable degradation of indole alkaloid (1-(6-methoxy-1H-indol-2-yl)ethan-1-imine) |
| --- |
|  |

| Cytisine |
| --- |
|  |

| Probable degradation of isoquinoline alkaloid (1,5-isoquinolinediol or isomer) |
| --- |
|  |

| Nicotine |
| --- |
|  |

| Sinapine |
| --- |
|  |

| Nupharidine |
| --- |
|  |

| Cellobiose |
| --- |
|  |

| Gluconic acid or isomer |
| --- |
|  |

| Hexitol |
| --- |
|  |

| Trisaccharide (tree hexose units) |
| --- |
|  |

| Xylitol |
| --- |
|  |

| Chitobiose |
| --- |
|  |

| Gallic acid |
| --- |
|  |

| 1,2,3,6-Tetra-O-galloyl-β-D-glucose |
| --- |
|  |

| 1-O,6-O-digalloyl-β-D-glucose |
| --- |
|  |

| 9,12,13-Trihydroxy-15-octadecenoic acid |
| --- |
|  |

| Pinolenic acid |
| --- |
|  |

| Suberic acid |
| --- |
|  |

| 12,13-Dihydroxy-9-octadecenoic acid |
| --- |
|  |

| 9-Hydroxy-octadecadienoic acid |
| --- |
|  |

| O-Arachidonoyl ethanolamine |
| --- |
|  |

| 12-oxo Phytodienoic Acid |
| --- |
|  |

| Uric acid |
| --- |
|  |

| 6-methoxyquinoline |
| --- |
|  |

| Xanthine |
| --- |
|  |

| Caffeine |
| --- |
|  |

| Fraxetin |
| --- |
|  |

| N1-[4-(1,3-Oxazol-5-yl)phenyl]cyclopropane-1-carboxamide |
| --- |
|  |

| N-Benzoyl-L-phenyalaninol |
| --- |
|  |

| Arginine |
| --- |
|  |

| Tryptophan |
| --- |
|  |

| Phenylalanine |
| --- |
|  |

| Carnitine |
| --- |
|  |

| N-Acetyl-glutamic acid |
| --- |
|  |

| Tyrosine |
| --- |
|  |

| Histidine |
| --- |
|  |

| Citric acid |
| --- |
|  |

| P-coumaric acid |
| --- |
|  |

| Gentisic acid |
| --- |
|  |

| 3-Anisic acid |
| --- |
|  |

| 4-Hydroxyphenylacetic acid |
| --- |
|  |

| Ferulic acid |
| --- |
|  |

| Isoferulic acid |
| --- |
|  |

| Quercetin 3-O-acetyl-rhamnoside |
| --- |
|  |

| Quercitrin |
| --- |
|  |

| Myricitrin |
| --- |
|  |

| Myricetin 3-O-galactopyranoside |
| --- |
|  |

| 7-Hydroxy-2-(4-hydroxyphenyl)-4-oxo-3,4-dihydro-2H-chromen-5-yl β-D-glucopyranoside ([Salipurposid](https://www.ncbi.nlm.nih.gov/pcsubstance/?term=%22Salipurposid%22%5bCompleteSynonym%5d%20AND%205321085%5bStandardizedCID%5d)) o isomero Isosalipurposide |
| --- |
|  |

| Kaempferol 3-(2''-acetylrhamnoside) |
| --- |
|  |

| Afzelin (kaempferol 3-rhamnoside) |
| --- |
|  |

| Naringenin |
| --- |
|  |

| 18-β-Glycyrrhetinic acid |
| --- |
|  |

| Neovasipyridone E |
| --- |
|  |

| Aspernigrin A |
| --- |
|  |

| Libertellenone G |
| --- |
|  |

| 2-furoylglycine |
| --- |
|  |

| Unknown I |
| --- |
|  |

| Unknown II |
| --- |
|  |

| Unknown III |
| --- |
|  |
